# Supplementary material for: Gossypitrin, A Naturally Occurring Flavonoid, Attenuates Iron-Induced Neuronal and Mitochondrial Damage
Source: MDPI journal article supplement (doi:10.3390/molecules26113364), 2021-06-02
Supplement: s1 [file s1]

## Supporting Information

# Gossypitrin, A Naturally Occurring Flavonoid, Attenuates Iron-Induced Neuronal and Mitochondrial Damage

**María Ángeles Bécquer-Viart <sup>1</sup>, Adonis Armentero-López <sup>1</sup>, Daniel Alvarez-Almiñanaque <sup>1</sup>, Roberto Fernández-Acosta <sup>2</sup>, Yasser Matos-Peralta <sup>3</sup>, Richard F. D’Vries <sup>4</sup>, Javier Marín-Prida <sup>1</sup> and Gilberto L. Pardo-Andreu <sup>1,\*</sup>**

<sup>1</sup> Center for Research and Biological Evaluations, Institute of Pharmaceutical and Food Sciences, University of Havana, 222 St. #2317 b/ 23 and 31, La Coronela, La Lisa, CP 13600, La Habana, Cuba; mabecquer@ifal.uh.cu (M.A.B.-V.); adonis.armenteros@ifal.uh.cu (A.A.-L.); dani@ifal.uh.cu (D.A.-A.); javier.marin@ifal.uh.cu (J.M.-P.)

<sup>2</sup> Pharmacy Department, Institute of Pharmaceutical and Food Sciences, University of Havana, 222 St. #2317 b/ 23 and 31, La Coronela, La Lisa, CP 13600, La Habana, Cuba; roberto.fernandezac91@gmail.com

<sup>3</sup> Bioinorganic Laboratory, Faculty of Chemistry, University of Havana, Zapata and G, Vedado, CP 10400, La Habana, Cuba; yasser.matos@fq.uh.cu

<sup>4</sup> Facultad de Ciencias Básicas, Universidad Santiago de Cali, Calle 5 # 62-00, CP 76001, Cali, Valle del Cauca, Colombia; richard.dvries00@usc.edu.co

\* Correspondence: gpardo@ifal.uh.cu; Tel.: +53-7271-8534

The  $^1\text{H}$ -NMR,  $^{13}\text{C}$ -NMR, and HSQC spectra of gossypitrin are shown in Figures S1, S2, and S3, respectively.

$^1\text{H}$  NMR (400 MHz,  $\text{DMSO}-d_6$ )  $\delta$  8.07 (d,  $J = 2.1$  Hz, 1H), 7.91 (dd,  $J = 8.6, 2.1$  Hz, 1H), 6.99 (d,  $J = 8.6$  Hz, 1H), 6.26 (s, 1H), 4.83 (d,  $J = 7.3$  Hz, 1H), 3.75 (dd,  $J = 9.6$  Hz, 1H), 3.59 (dd,  $J = 12.4$  Hz, 1H), 3.46 – 3.25 (m, 38H).

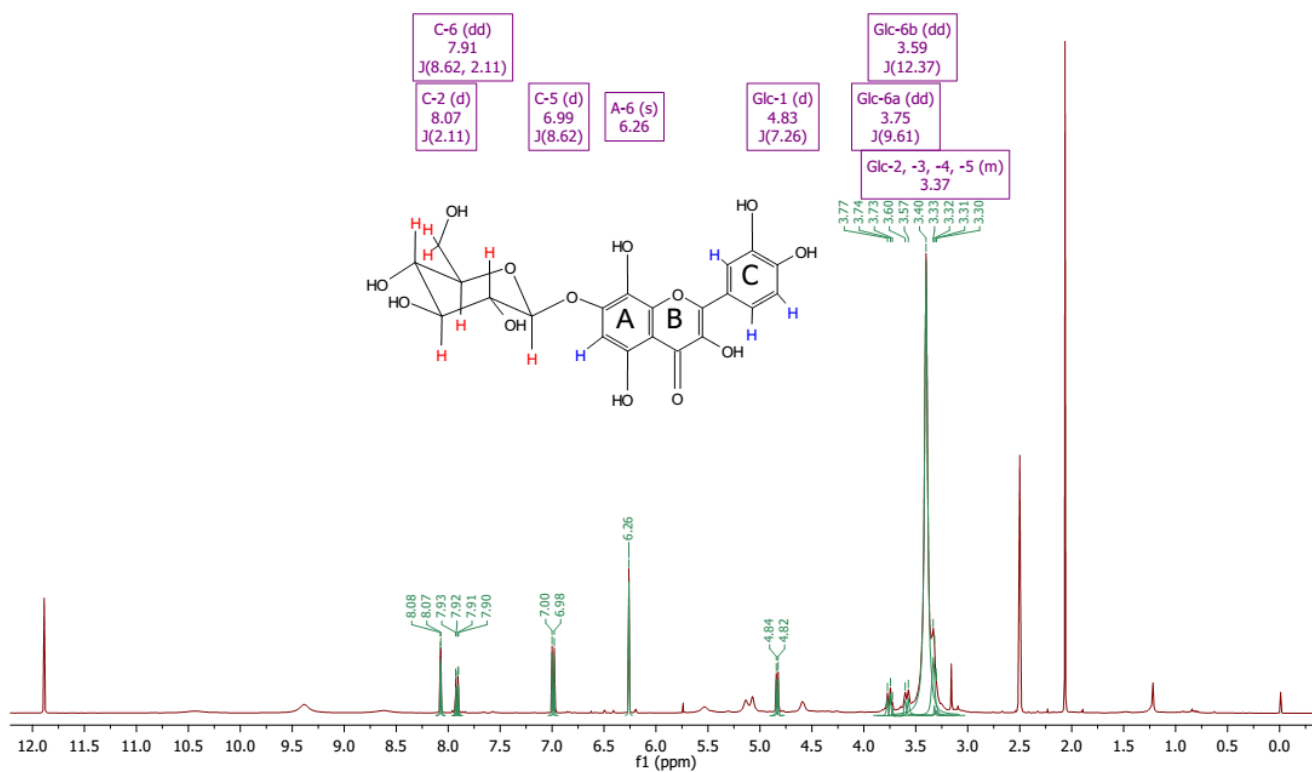

**Figure S1.**  $^1\text{H}$ -NMR (400 MHz) spectrum of gossypitrin in  $\text{DMSO}-d_6$ .

$^{13}\text{C}$  NMR (101 MHz, dms $\text{o}$ )  $\delta$  176.23, 153.24, 152.50, 148.78, 146.07, 145.19, 145.11, 135.81, 124.52, 123.45, 122.54, 116.05, 115.95, 102.79, 102.00, 98.17, 76.88, 76.14, 73.29, 69.32, 60.34.

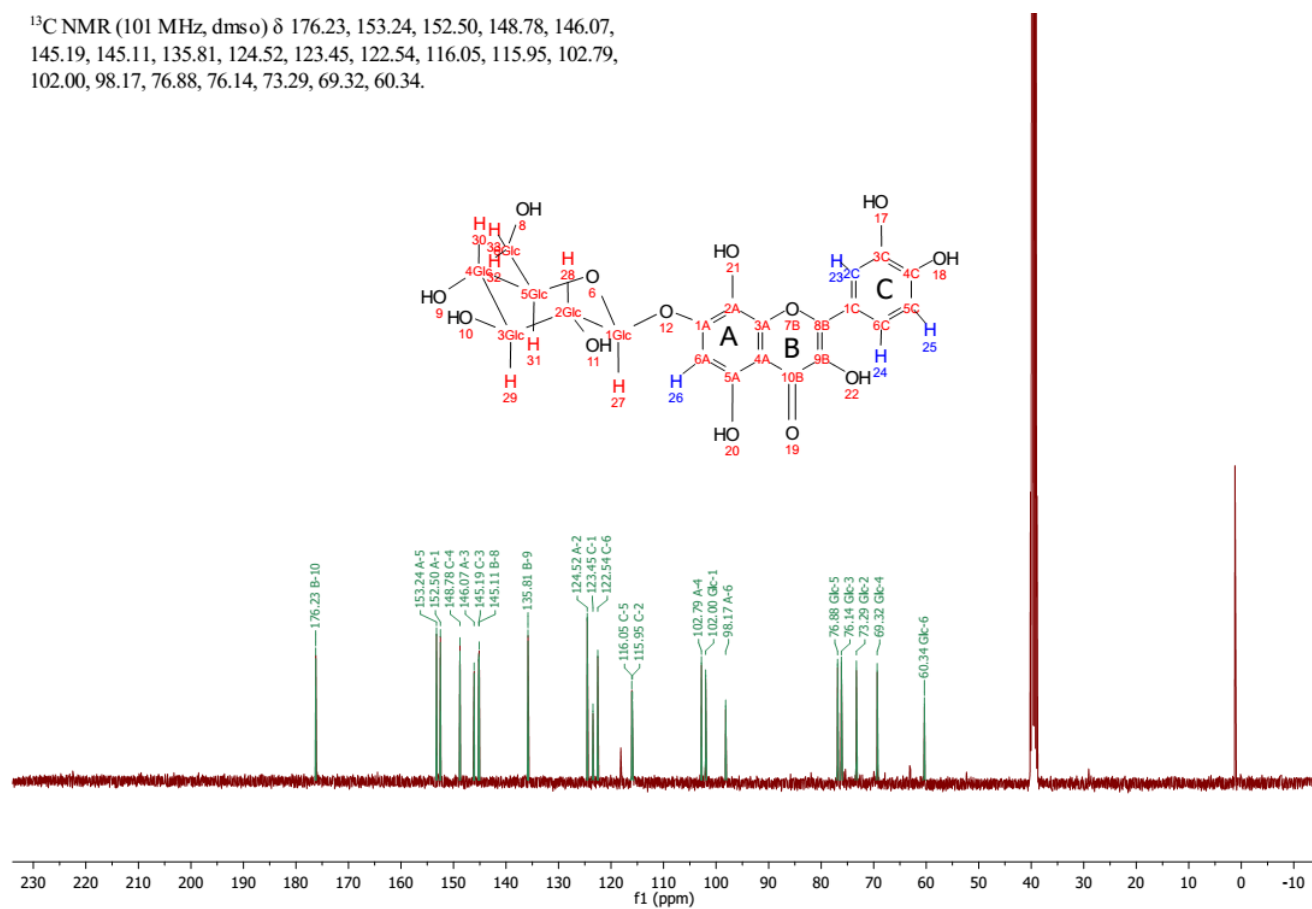

**Figure S2.**  $^{13}\text{C}$ -NMR (101 MHz) spectrum of gossypitrin in  $\text{DMSO-}d_6$ .

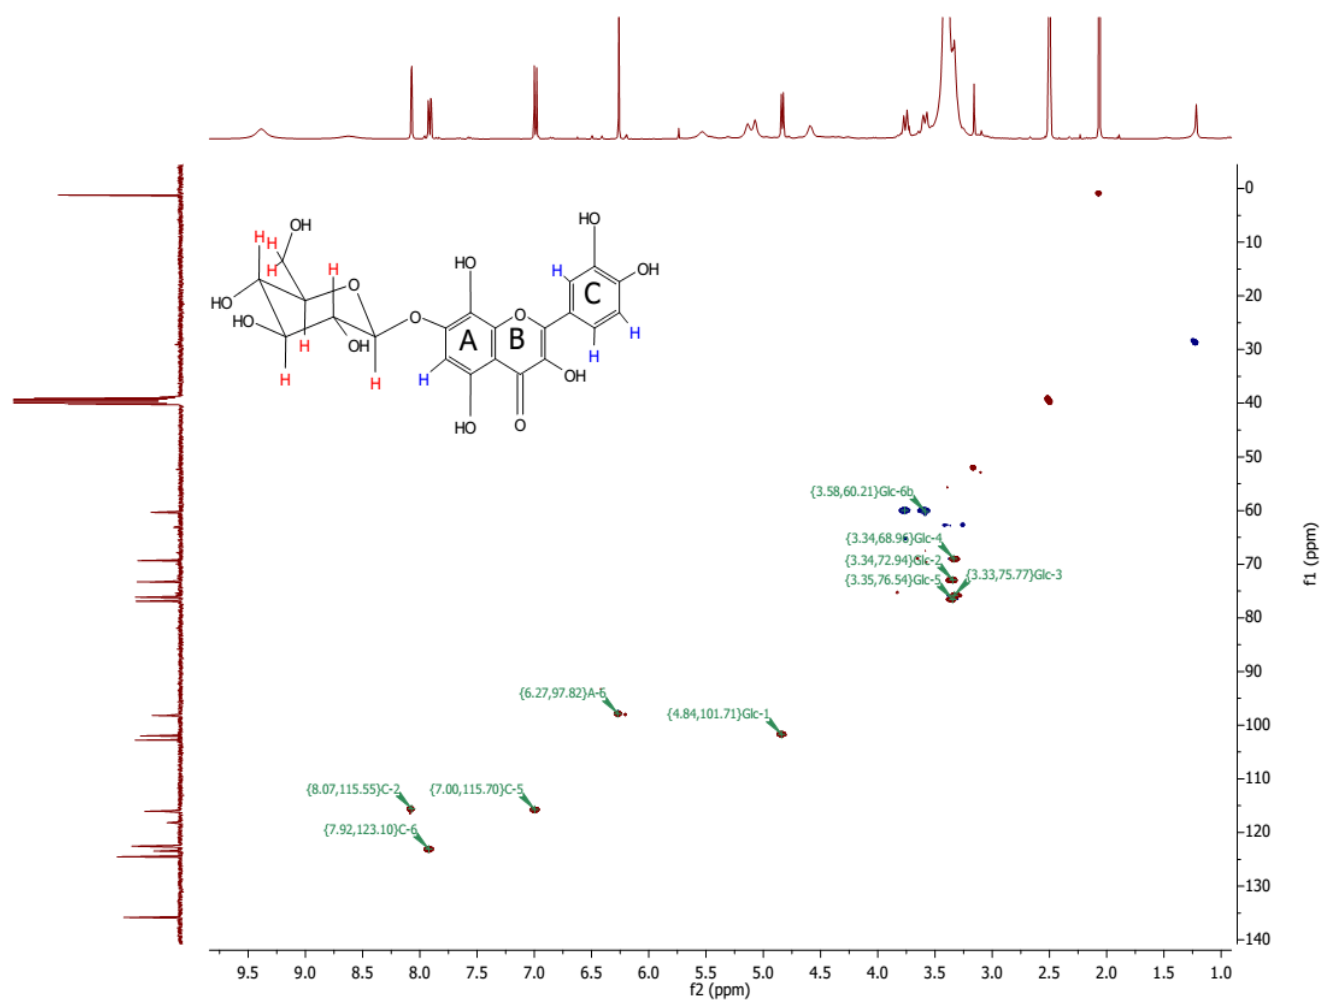

**Figure S3.** HSQC spectrum of gossypitrin in DMSO- $d_6$ .

In table 1, NMR data collected verified the structure of the gossypitrin molecule in comparison with previous report (Schliemann et al., 2006).

**Table 1.**  $^1\text{H}$  (400 MHz) and  $^{13}\text{C}$  (100 MHz) data of gossypitrin

| No.  | DMSO- $d_6$             |            | Schliemann et al., 2006 |  |
|------|-------------------------|------------|-------------------------|--|
|      | $\delta$ , mult., J(Hz) | $\delta^a$ | $\delta$ (125 MHz)      |  |
| 2    |                         | 146.0      | 147.3                   |  |
| 3    | 9.41, s                 | 135.7      | 135.6                   |  |
| 4    |                         | 176.1      | 175.9                   |  |
| 5    |                         | 153.1      | 151.0                   |  |
| 6    | 6.26, s                 | 98.0       | 97.8                    |  |
| 7    |                         | 152.4      | 150.0                   |  |
| 8    |                         | 124.4      | 126.6                   |  |
| 9    |                         | 145.0      | 143.1                   |  |
| 10   |                         | 102.7      | 104.4                   |  |
| 1'   |                         | 123.3      | 122.0                   |  |
| 2'   | 8.08, d                 | 115.7      | 115.2                   |  |
| 3'   |                         | 145.1      | 144.7                   |  |
| 4'   |                         | 148.6      | 147.5                   |  |
| 5'   | 6.97, d                 | 115.9      | 115.6                   |  |
| 6'   | 7.89, dd                | 122.4      | 120.3                   |  |
| 1''  | 4.84, d                 | 101.8      | 101.4                   |  |
| 2''  | 3.74, m                 | 73.2       | 73.2                    |  |
| 3''  | 3.76, m                 | 76.0       | 75.3                    |  |
| 4''  | 3.14, m                 | 69.2       | 69.6                    |  |
| 5''  | 3.32, m                 | 76.7       | 77.3                    |  |
| 6''A |                         | 60.6       | 60.2                    |  |
| 6''B |                         |            |                         |  |

<sup>a</sup> Chemical shift obtained from HSQC and HMBC spectra

Chemical shifts from the glycoside protons:  $\delta = 5.56$  ppm,  $\delta = 5.11$  ppm,  $\delta = 4.82$  ppm and  $\delta = 4.63$  ppm. Exchangeable phenolic signals of aglycone:  $\delta = 11.89$  (s, 5-OH),  $\delta = 10.5$  (s, 4'-OH),  $\delta = 9.44$  (s, 3'-OH),  $\delta = 8.66$  (s, 8-OH).

## Reference

Schliemann, W.; Schneider, B.; Wray, V.; Schmidt, J.; Nimtz, M.; Porzel, A.; Böhm, H.,. Flavonols and an indole alkaloid skeleton bearing identical acylated glycosidic groups from yellow petals of *Papaver nudicaule*. *Phytochemistry* **2006**, 67, 191–201. DOI: 10.1016/j.phytochem.2005.11.002
